# Supplementary material
Source: PubMed Central journal article supplement (PMC2922471)
Supplement: NIHMS193036-supplement-4_si_004.pdf [file NIHMS193036-supplement-4_si_004.pdf]

**Supplemental Table 5.** Phosphoproteins with Ox-PAPC-induced phosphorylation levels that are involved in focal adhesion (KEGG pathway hsa04510)

| Protein                                    | Entrez                    | Phosphorylation site induced by Ox-PAPC. Bovine site (Human site) <sup>a</sup> | Reported activation by Ox-PAPC <sup>b</sup>                                |
|--------------------------------------------|---------------------------|--------------------------------------------------------------------------------|----------------------------------------------------------------------------|
| ZYXIN                                      | ZYX                       | S11 (S73)                                                                      |                                                                            |
| PAXILLIN                                   | PXN                       | S302 (S272)                                                                    | Phosphosites reported <sup>32</sup><br>Y31<br>Y118<br>S126<br>S178<br>S273 |
| INTEGRIN, BETA 1                           | ITGB1                     | Y783 (Y783)                                                                    | Yes, but no phosphosite identified <sup>34</sup>                           |
| MYOSIN LIGHT CHAIN 2                       | MLC2/<br>MRLC2/<br>MYL12B | T18 (T19)<br>S19 (S20)                                                         | Reported no change of this site upon induction by Ox-PAPC <sup>12</sup>    |
| INTEGRIN, BETA 4                           | ITGB4                     | S1060 (S1069)<br>S1442 (S1454)<br>S1445 (S1457)                                |                                                                            |
| SHC TRANSFORMING PROTEIN 1                 | SHC1                      | Y428 (Y428)                                                                    |                                                                            |
| P21 PROTEIN (CDC42/RAC)-ACTIVATED KINASE 2 | PAK2                      | S5 (S197)                                                                      | Phosphosite reported in PAK1 <sup>32</sup><br>T423                         |
| INTEGRIN, BETA 3                           | ITGB3                     | Y781 (Y785)                                                                    |                                                                            |
| CAVEOLIN 1                                 | CAV1                      | Y14 (Y14)                                                                      | Phosphosite reported <sup>33</sup><br>Y14                                  |
| MITOGEN-ACTIVATED PROTEIN KINASE 1         | MAPK1                     | Y187 (Y187)                                                                    | Phosphosite reported <sup>9,31</sup><br>T185<br>Y187                       |
| ACTIN, BETA                                | ACTB                      | Y169 (Y169)                                                                    | Yes, but no phosphosite identified <sup>40</sup>                           |
| MITOGEN-ACTIVATED PROTEIN KINASE 3         | MAPK3                     | T185 (T202)<br>Y187 (Y204)                                                     | Phosphosite reported <sup>9,31</sup><br>T202<br>Y204                       |
| ACTININ, ALPHA 1                           | ACTN1                     | Y246 (Y246)                                                                    |                                                                            |
| BREAST CANCER ANTI-ESTROGEN RESISTANCE 1   | BCAR1                     | T530 (T600)                                                                    |                                                                            |
| VINCULIN                                   | VCL                       | S290 (S290)<br>Y497 (Y822)                                                     | Yes, but no phosphosite identified <sup>41</sup>                           |
| KINASE INSERT DOMAIN RECEPTOR              | KDR/<br>VEGFR2            | Y1214 (Y1214)                                                                  | Phosphosite reported <sup>31</sup><br>Y1175                                |
| GLYCOGEN SYNTHASE KINASE 3 BETA            | GSK3B                     | Y216 (Y216)                                                                    |                                                                            |
| FILAMIN B, BETA                            | FLNB                      | S2112 (S2107)                                                                  |                                                                            |

<sup>a</sup> Phosphosite induction by Ox-PAPC observed in this study. <sup>b</sup> Previously reported phosphosite inductions by Ox-PAPC.
